# Supplementary material
Source: publisher figshare collection journal article supplement (https://karger.figshare.com/ndownloader/files/12785033)
Supplement: Supplementary file 1 [file 12785033]

|  | Mean difference  (95%CI) |  | Lower LOA  (95%CI) |  | Upper LOA  (95%CI) |  | Repeatibility Coefficient |  | ICC |  |
| --- | --- | --- | --- | --- | --- | --- | --- | --- | --- | --- |
|  | intra | inter | intra | inter | intra | inter | intra | inter | intra | inter |
| width of insertion | 0.037  (-0.56 ; 0.130) | 0.008  (-0.081 ; 0.097) | -0.469  (-0.630 ; -0.308) | -0.478  (-0.633 ; -0.324) | 0.543  (0.382 ; 0.703) | 0.494  (0.340 ; 0.649) | 0.506 | 0.486 | 0.920 | 0.917 |
| maximum width | 0.020  (-0.075 ; 0.115) | 0.037  (-0.043 ; 0.118) | -0.500  (-0.665 ; -0.335) | -0.401  (-0.540 ; -0.262) | 0.540  (0.375 ; 0.705) | 0.475  (0.336 ; 0.615) | 0.520 | 0.438 | 0.951 | 0.962 |
| volume | 0.703  (-0.056 ; 1.463) | 0.285  (-0.456 ; 1.025) | -3.438  (-4.753 ; -2.122) | -3.753  (-5.035 ; -2.470) | 4.844  (3.529 ; 6.159) | 4.322  (3.040 ; 5.605) | 4.141 | 4.038 | 0.997 | 0.997 |

*Table S5: intra and interobserver variability; LOA: limits of agreement, ICC: intraclass correlation coefficient*
